# Supplementary material for: Gut Microbiome Profiles and Associated Metabolic Pathways in HIV-Infected Treatment-Naïve Patients
Source: PubMed Central journal article supplement (PMC7917727; doi:10.3390/cells10020385), 2021-02-13
Supplement: cells-10-00385-s001.pdf [file cells-10-00385-s001.pdf]

# Gut Microbiome Profiles and Associated Metabolic Pathways in HIV-Infected Treatment-Naïve Patients

Wellinton M. do Nascimento <sup>1,2</sup>, Aline Machiavelli <sup>1,2</sup>, Luiz G. E. Ferreira <sup>3</sup>, Luisa Cruz Silveira <sup>1</sup>, Suwellen S. D. de Azevedo <sup>4</sup>, Gonzalo Bello <sup>4</sup>, Daniel P. Smith <sup>5</sup>, Melissa P. Mezzari <sup>5</sup>, Joseph F. Petrosino <sup>5</sup>, Rubens Tadeu Delgado Duarte <sup>6</sup>, Carlos R. Zárata-Bladés <sup>2,\*†</sup> and Aguinaldo R. Pinto <sup>1,†</sup>

## Supplementary Figures:

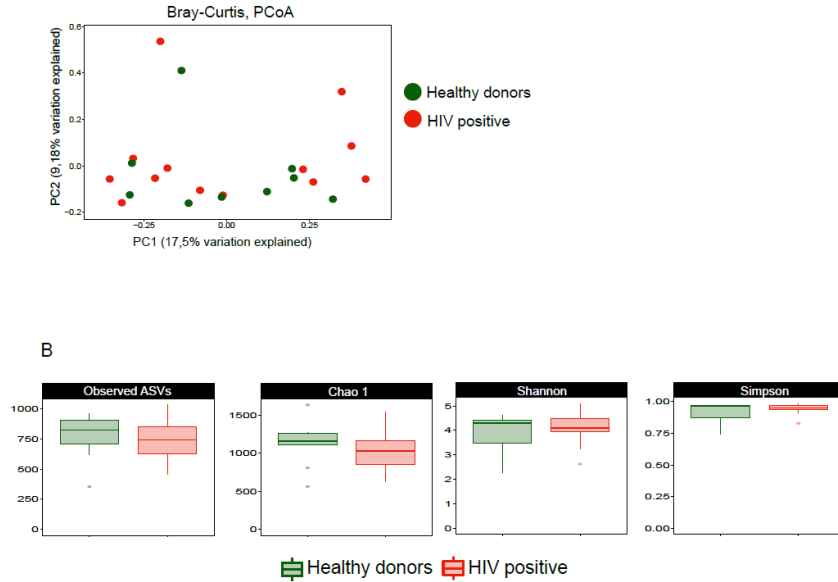

**Figure 1.** Comparison of gut microbiota of HIV-1 positive and healthy donors. PCoA of Bray Curtis distances among groups (a). Total number of ASVs observed, Richness (Chao1) and diversity (Shannon and Simpson) indices (b).

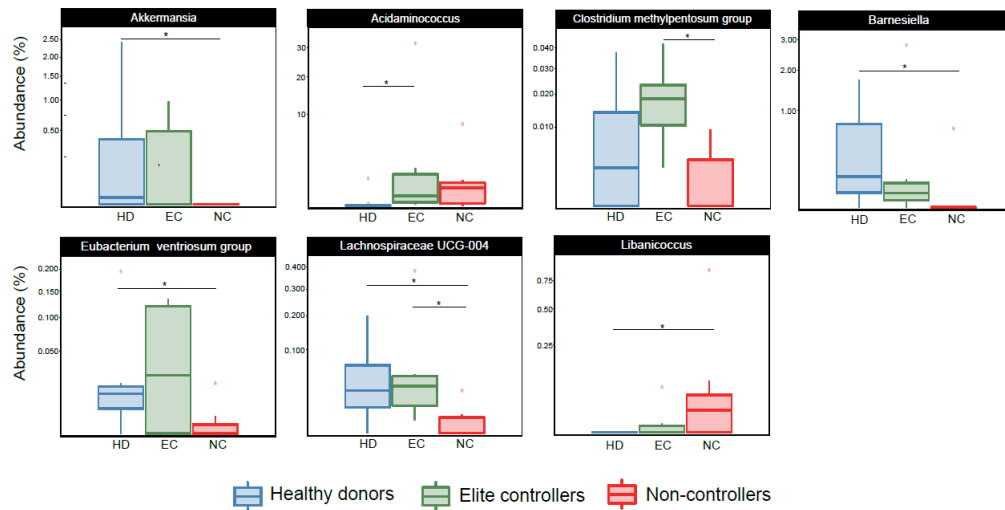

**Figure S2.** Comparison of gut microbiota of healthy donors (HD), elite controllers (EC) and Non-controllers (NC). The relative abundance of genera identified by LEfSe as being differentially abundant between groups were compared using the Kruskal-Wallis test. \**P* values <0.05.
